# Supplementary material for: Influence of acute pain on valence rating of words
Source: PubMed Central journal article supplement (PMC7971552; doi:10.1371/journal.pone.0248744), 2021-03-18
Supplement: pone.0248744.s001.pdf [file pone.0248744.s001.pdf]

**S1 Table. Valence ratings (mean  $\pm$  SD) of each word in the main experiment.**

| Experiment 1 with painful primes |      |      | Experiment 1 without painful primes |      |      | Experiment 2 with painful primes |      |      | Experiment 2 without painful primes |      |      |
|----------------------------------|------|------|-------------------------------------|------|------|----------------------------------|------|------|-------------------------------------|------|------|
| word                             | mean | SD   | word                                | mean | SD   | word                             | mean | SD   | word                                | mean | SD   |
| <b>pain-related</b>              |      |      | <b>pain-related</b>                 |      |      | <b>pain-related</b>              |      |      | <b>pain-related</b>                 |      |      |
| quälend                          | 7.02 | 0.35 | quälend                             | 6.98 | 0.57 | quälend                          | 7.65 | 0.11 | quälend                             | 7.51 | 0.15 |
| lähmend                          | 6.89 | 0.56 | lähmend                             | 6.48 | 0.82 | lähmend                          | 6.99 | 0.10 | lähmend                             | 6.73 | 0.22 |
| zermürbend                       | 6.63 | 0.65 | zermürbend                          | 6.72 | 0.48 | zermürbend                       | 7.15 | 0.11 | zermürbend                          | 6.89 | 0.10 |
| peinigend                        | 7.47 | 0.43 | peinigend                           | 6.74 | 0.75 | peinigend                        | 7.54 | 0.16 | peinigend                           | 7.39 | 0.19 |
| plagend                          | 7.19 | 0.49 | plagend                             | 6.50 | 0.64 | plagend                          | 7.29 | 0.15 | plagend                             | 6.97 | 0.18 |
| kneifend                         | 6.30 | 0.61 | kneifend                            | 5.79 | 0.75 | kneifend                         | 6.71 | 0.20 | kneifend                            | 6.42 | 0.17 |
| quetschend                       | 6.72 | 0.56 | quetschend                          | 6.53 | 0.65 | quetschend                       | 6.93 | 0.18 | quetschend                          | 6.73 | 0.22 |
| bohrend                          | 6.32 | 0.54 | bohrend                             | 6.28 | 0.73 | bohrend                          | 6.54 | 0.25 | bohrend                             | 6.27 | 0.36 |
| kolikartig                       | 6.22 | 0.67 | kolikartig                          | 5.65 | 0.59 | kolikartig                       | 6.81 | 0.28 | kolikartig                          | 6.64 | 0.26 |
| krampfartig                      | 6.92 | 0.52 | krampfartig                         | 6.41 | 0.74 | krampfartig                      | 7.29 | 0.20 | krampfartig                         | 7.13 | 0.29 |
| <b>negative</b>                  |      |      | <b>negative</b>                     |      |      | <b>negative</b>                  |      |      | <b>negative</b>                     |      |      |
| eklig                            | 6.58 | 0.52 | eklig                               | 6.81 | 0.39 | eklig                            | 6.80 | 0.25 | eklig                               | 6.71 | 0.13 |
| feindlich                        | 7.02 | 0.78 | feindlich                           | 7.24 | 0.48 | feindlich                        | 7.42 | 0.32 | feindlich                           | 7.12 | 0.31 |
| intrigant                        | 6.92 | 0.48 | intrigant                           | 6.74 | 0.50 | intrigant                        | 7.19 | 0.19 | intrigant                           | 6.93 | 0.27 |
| widerlich                        | 6.55 | 0.83 | widerlich                           | 6.41 | 0.64 | widerlich                        | 7.14 | 0.21 | widerlich                           | 6.93 | 0.30 |
| warzig                           | 6.85 | 0.57 | warzig                              | 6.54 | 0.64 | warzig                           | 7.08 | 0.21 | warzig                              | 6.99 | 0.18 |
| schimmelig                       | 6.73 | 0.70 | schimmelig                          | 6.42 | 0.65 | schimmelig                       | 7.00 | 0.11 | schimmelig                          | 6.82 | 0.10 |
| stinkend                         | 6.76 | 0.49 | stinkend                            | 6.61 | 0.65 | stinkend                         | 6.80 | 0.12 | stinkend                            | 6.61 | 0.13 |
| verdreckt                        | 6.57 | 0.55 | verdreckt                           | 5.85 | 0.56 | verdreckt                        | 6.64 | 0.15 | verdreckt                           | 6.49 | 0.11 |
| angsteinflößend                  | 6.53 | 0.60 | angsteinflößend                     | 6.36 | 0.50 | angsteinflößend                  | 7.38 | 0.36 | angsteinflößend                     | 7.21 | 0.44 |
| hasserfüllt                      | 7.44 | 0.40 | hasserfüllt                         | 7.18 | 0.55 | hasserfüllt                      | 8.04 | 0.28 | hasserfüllt                         | 7.92 | 0.31 |

|                |      |      |
|----------------|------|------|
| <b>neutral</b> |      |      |
| gehend         | 4.68 | 0.61 |
| eckig          | 4.98 | 0.58 |
| kurzhaarig     | 4.78 | 0.33 |
| eiförmig       | 4.65 | 0.57 |
| gewölbt        | 4.68 | 0.58 |
| aschblond      | 4.86 | 0.65 |
| klappbar       | 4.99 | 0.58 |
| kubisch        | 4.95 | 0.48 |
| traubenförmig  | 4.73 | 0.59 |
| auditiv        | 4.76 | 0.51 |

|                 |      |      |
|-----------------|------|------|
| <b>positive</b> |      |      |
| streichelnd     | 3.43 | 0.51 |
| wärmend         | 3.03 | 0.69 |
| erquickend      | 3.33 | 0.73 |
| beschwingend    | 3.78 | 0.57 |
| himmlisch       | 3.31 | 0.56 |
| flirtend        | 3.15 | 0.64 |
| kuschelnd       | 3.04 | 0.64 |
| küssend         | 2.93 | 0.66 |
| hocherotisch    | 3.52 | 0.63 |
| bezaubernd      | 3.04 | 0.61 |

|                |      |      |
|----------------|------|------|
| <b>neutral</b> |      |      |
| gehend         | 4.61 | 0.48 |
| eckig          | 4.65 | 0.52 |
| kurzhaarig     | 4.52 | 0.71 |
| eiförmig       | 4.61 | 0.57 |
| gewölbt        | 4.65 | 0.64 |
| aschblond      | 4.77 | 0.73 |
| klappbar       | 4.80 | 0.55 |
| kubisch        | 4.98 | 0.68 |
| traubenförmig  | 4.25 | 0.56 |
| auditiv        | 4.18 | 0.49 |

|                 |      |      |
|-----------------|------|------|
| <b>positive</b> |      |      |
| streichelnd     | 2.98 | 0.66 |
| wärmend         | 3.11 | 0.73 |
| erquickend      | 3.53 | 0.67 |
| beschwingend    | 2.97 | 0.30 |
| himmlisch       | 2.68 | 0.78 |
| flirtend        | 3.09 | 0.60 |
| kuschelnd       | 2.41 | 0.54 |
| küssend         | 2.45 | 0.48 |
| hocherotisch    | 3.18 | 0.58 |
| bezaubernd      | 2.53 | 0.78 |

|                |      |      |
|----------------|------|------|
| <b>neutral</b> |      |      |
| gehend         | 4.56 | 0.29 |
| eckig          | 4.99 | 0.27 |
| kurzhaarig     | 4.87 | 0.38 |
| eiförmig       | 4.88 | 0.14 |
| gewölbt        | 4.88 | 0.32 |
| aschblond      | 4.50 | 0.20 |
| klappbar       | 4.67 | 0.07 |
| kubisch        | 4.73 | 0.23 |
| traubenförmig  | 4.74 | 0.31 |
| auditiv        | 4.33 | 0.08 |

|                 |      |      |
|-----------------|------|------|
| <b>positive</b> |      |      |
| streichelnd     | 2.53 | 0.24 |
| wärmend         | 2.53 | 0.21 |
| erquickend      | 2.96 | 0.18 |
| beschwingend    | 2.95 | 0.16 |
| himmlisch       | 2.29 | 0.19 |
| flirtend        | 2.57 | 0.25 |
| kuschelnd       | 2.12 | 0.19 |
| küssend         | 2.18 | 0.25 |
| hocherotisch    | 3.12 | 0.17 |
| bezaubernd      | 2.45 | 0.20 |

|                |      |      |
|----------------|------|------|
| <b>neutral</b> |      |      |
| gehend         | 4.42 | 0.31 |
| eckig          | 4.91 | 0.23 |
| kurzhaarig     | 4.80 | 0.34 |
| eiförmig       | 4.83 | 0.08 |
| gewölbt        | 4.64 | 0.10 |
| aschblond      | 4.41 | 0.17 |
| klappbar       | 4.63 | 0.06 |
| kubisch        | 4.53 | 0.13 |
| traubenförmig  | 4.57 | 0.11 |
| auditiv        | 4.20 | 0.11 |

|                 |      |      |
|-----------------|------|------|
| <b>positive</b> |      |      |
| streichelnd     | 2.31 | 0.26 |
| wärmend         | 2.36 | 0.23 |
| erquickend      | 2.70 | 0.20 |
| beschwingend    | 2.83 | 0.29 |
| himmlisch       | 2.13 | 0.11 |
| flirtend        | 2.42 | 0.18 |
| kuschelnd       | 1.84 | 0.16 |
| küssend         | 1.96 | 0.21 |
| hocherotisch    | 2.86 | 0.20 |
| bezaubernd      | 2.16 | 0.14 |
