# Supplementary material for: Influence of acute pain on valence rating of words
Source: PLoS One. 2021 Mar 18;16(3):e0248744. doi: 10.1371/journal.pone.0248744 (PMC7971552; doi:10.1371/journal.pone.0248744)
Supplement: S2 Table — (PDF) [file pone.0248744.s002.pdf]

\*\*\*:  $p < 0.001$ , \*\*:  $p < 0.01$ , \*:  $p < 0.05$ .

[illegible][illegible]

neutral words

[illegible]

**positive words**

[illegible]
